# Supplementary material
Source: PubMed Central journal article supplement (PMC5920564)
Supplement: NIHMS953144-supplement-Material.pdf [file NIHMS953144-supplement-Material.pdf]

# Multi-plexed proteome analysis with neutron-encoded stable isotope labeling in cells and mice

Katherine A. Overmyer, Stefka Tyanova, Alex S. Hebert, Michael S. Westphall, Jürgen Cox, and Joshua J. Coon

## Supplementary Material

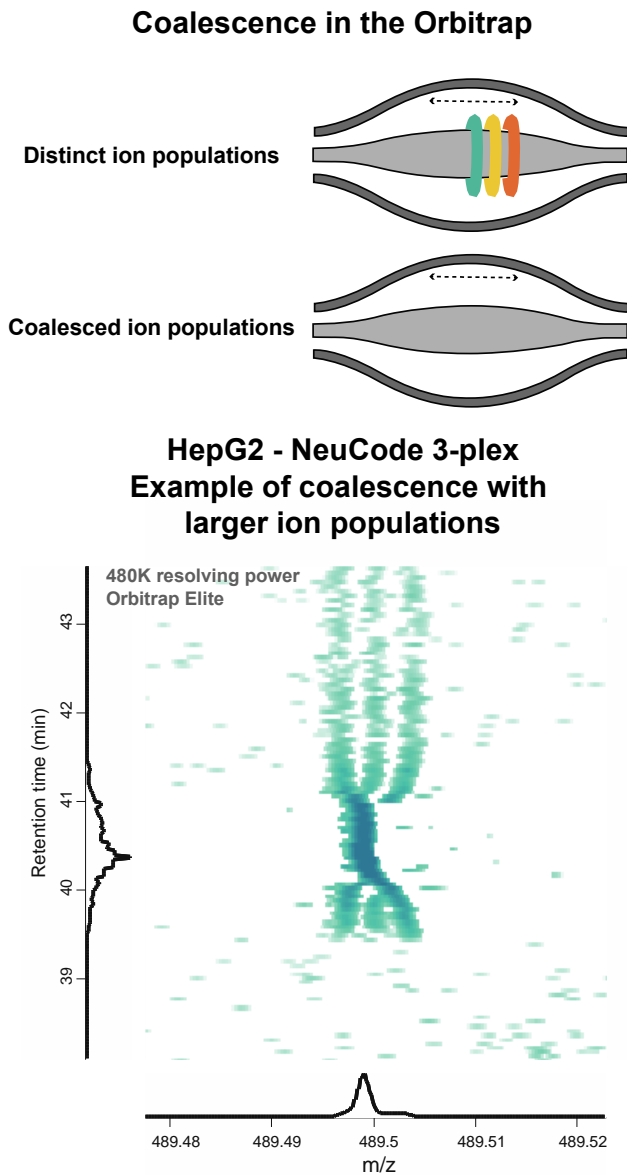

**Supplementary Figure 1.** High-abundance ion populations in the Orbitrap can exhibit space charge induced frequency shifts resulting in coalescence of the observed m/z.

Coalescence is more likely to occur with NeuCode peaks due to the close mass-to-charge but will occur in proportion to the abundance of the ion population. Exemplified in this figure is the observed coalescence of the NeuCode channels with increased ion intensity. Reduction of the automatic gain control (AGC) target will limit the ions permitted into the Orbitrap mass analyzer and thus minimize the coalescence of NeuCode peaks (see ?Troubleshooting).

**Supplementary Table 1. Orbitrap Elite method settings for 240,000 MS<sup>1</sup> resolving power.**

| <b>Scan Event</b>         | <b>Method Setting</b>       | <b>Value</b>    |   |
|---------------------------|-----------------------------|-----------------|---|
| Scan Event 1              | Analyzer                    | FTMS            |   |
|                           | Mass Range                  | Normal          |   |
|                           | Resolution                  | 240000          |   |
|                           | Scan Type                   | Full            |   |
|                           | Polarity                    | Positive        |   |
|                           | Data Type                   | Profile         |   |
|                           | Scan Range                  | 300-1250<br>m/z |   |
| Scan Event 2-21           | Analyzer                    | Ion Trap        |   |
|                           | Mass Range                  | Normal          |   |
|                           | Scan Rate                   | Rapid           |   |
|                           | Data Type                   | Centroid        |   |
|                           | Dependent Scan              | Yes             |   |
|                           |                             | Scan Event      | 1 |
|                           | Mass determined from        | 1               |   |
|                           | Activation Type             | CID             |   |
|                           | Default charge state        | 2               |   |
|                           | Minimum Signal Required     | 500             |   |
|                           | Isolation width m/z         | 2               |   |
|                           | Normalized collision energy | 35              |   |
|                           | Activation Q                | 0.25            |   |
|                           | Activation time (ms)        | 5               |   |
|                           | Dynamic Exclusion           | Enabled         |   |
|                           | Repeat count                | 1               |   |
|                           | Repeat duration (s)         | 45              |   |
| Exclusion list size       | 500                         |                 |   |
| Exclusion duration        | 45                          |                 |   |
| Exclusion mass width low  | 25 ppm                      |                 |   |
| Exclusion mass width high | 10 ppm                      |                 |   |

**Supplementary Table 2. Orbitrap Fusion or Fusion Lumos method settings for 240,000 MS<sup>1</sup> resolving power.**

| <b>Experiment</b> | <b>Method Parameter</b>  | <b>Value</b> |
|-------------------|--------------------------|--------------|
| Experiment 1      | Cycle time (sec)         | 2            |
|                   | MS OT                    |              |
|                   | Detector Type            | Orbitrap     |
|                   | Orbitrap Resolution      | 240000       |
|                   | Mass Range               | Normal       |
|                   | Use Quadrupole Isolation | True         |
|                   | Scan Range (m/z)         | 350-1100     |

|                                                                  |                  |
|------------------------------------------------------------------|------------------|
| RF Lens (%)                                                      | 30               |
| AGC Target                                                       | 1.0e6            |
| Maximum Injection Time (ms)                                      | 100              |
| Microscans                                                       | 1                |
| Data Type                                                        | Profile          |
| Polarity                                                         | Positive         |
| Source Fragmentation                                             | Disabled         |
| Use EASY-IC                                                      | False            |
| Monoisotopic Precursor Selection (MIPS) Filter                   |                  |
| Monoisotopic Peak Determination                                  | Peptide          |
| Relax restrictions when too few precursors are found             | True             |
| Exclude undetermined Charge States                               | True             |
| Charge State Filter                                              |                  |
| Include charge state(s)                                          | 2-6              |
| Include undetermined charge states                               | False            |
| Include charge states 25 and higher                              | False            |
| Dynamic Exclusion Filter                                         |                  |
| Exclude after n times                                            | 1                |
| Exclusion duration (sec)                                         | 5                |
| Mass Tolerance                                                   | m/z              |
| Low                                                              | 0.55             |
| High                                                             | 1.55             |
| Exclude Isotopes                                                 | False            |
| Perform dependent scan on single charge state per precursor only | False            |
| Decisions                                                        |                  |
| Data dependent mode                                              | TopSpeed         |
| Precursor Priority                                               | Most Intense     |
| Number of Scan Event Types                                       | 1                |
| Scan Event Type 1                                                | ddMS2 IT HCD     |
| MS <sub>n</sub> Level                                            | 2                |
| Isolation Mode                                                   | Quadrupole       |
| Use isolation m/z offset                                         | False            |
| Activation Type                                                  | HCD              |
| HCD Collision Energy (%)                                         | 30               |
| Stepped Collision Energy                                         | False            |
| Detector Type                                                    | Ion Trap         |
| Scan Range Mode                                                  | Define m/z range |
| Ion Trap Scan Rate                                               | Turbo            |
| Scan Range (m/z)                                                 | 200-1200         |
| AGC Target                                                       | 1.0e4            |
| Injection ions for all available parallelizable time             | False            |
| Maximum Injection Time (ms)                                      | 15               |
| Microscans                                                       | 1                |
| Data Type                                                        | Centroid         |
